# Supplementary material
Source: PubMed Central journal article supplement (PMC4718894)
Supplement: NIHMS739636-supplement.pdf [file NIHMS739636-supplement.pdf]

Supplementary Table 1: **Early Stage Patient Enrollment, Treatment, and Data Analysis**

|                                                                   |                                                                   |
|-------------------------------------------------------------------|-------------------------------------------------------------------|
| 239 Consented                                                     |                                                                   |
| 109 in the Usual Care Group                                       | 130 in the Intervention Group                                     |
| 105 Completed Baseline Assessment<br>(4 withdrew before baseline) | 130 Completed Baseline Assessment<br>(0 withdrew before baseline) |
| 105 Received Usual Care<br>12 Withdrew, 6 Died                    | 127 Received Intervention<br>5 Withdrew, 10 Died                  |
| 87 Completed 12 month Assessment                                  | 77 Completed 12 month Assessment*                                 |
| 66 had surgery                                                    | 52 had surgery                                                    |
| 54 had surgery within 3 months of study<br>enrollment             | 43 had surgery within 3 months of study<br>enrollment             |
| 33 had pre-op baseline                                            | 38 had pre-op baseline                                            |

\*The number of patients in the intervention group that completed 12 month assessment is smaller because the study ended prior to the 12 month assessment for some patients.
